# Supplementary material for: Giant magnetic anisotropy of a 5d transition metal decorated two-dimensional polyphthalocyanine framework
Source: Royal Society of Chemistry journal article supplement (doi:10.1039/c5tc04402b), 2016-01-01
Supplement: c5tc04402b1.pdf [file c5tc04402b1.pdf]

**Table S1.** Effective U value ( $U_{\text{ef}}$ ) versus the calculated MAE (in meV) of some systems with large MAE.

| $U_{\text{ef}}/\text{eV}$ | Re@Pc            | Os-Os@Pc | Ir-Ir@Pc |
|---------------------------|------------------|----------|----------|
| 0                         | 20.72            | 40.67    | 47.21    |
| 0.5                       | 21.10            | 60.99    | 92.38    |
| 1.0                       | 10.64            | 107.96   | 50.03    |
| 1.5                       | 17.67            | 73.88    | 46.63    |
| 2.0                       | N/A <sup>a</sup> | 32.04    | 44.05    |

<sup>a</sup>  $U = 2$  eV leads to failure of SCF convergence for Re@Pc.
